# Supplementary material for: Changing the Smoking Trajectory: Evaluating the Impact of School-Based Tobacco Interventions on Changes to Susceptibility to Future Smoking
Source: MDPI journal article supplement (doi:10.3390/ijerph14101182), 2017-10-05
Supplement: s1 [file s1]

**Table S1.** Baseline characteristics of students in control and intervention schools, 2012–13 COMPASS study, Ontario, ON, Canada.

| Characteristic at Baseline   |                         | Control Schools | Intervention Schools (Overall) | <i>p</i> -Value |
|------------------------------|-------------------------|-----------------|--------------------------------|-----------------|
| Susceptibility               | Non-susceptible         | 73.0            | 71.6                           | 0.295           |
|                              | Susceptible             | 27.0            | 28.4                           |                 |
| Age                          | 13 years                | 1.3             | 0.4                            | 0.027           |
|                              | 14 years                | 30.3            | 31.0                           |                 |
|                              | 15 years                | 35.4            | 36.2                           |                 |
|                              | 16 years                | 25.9            | 24.8                           |                 |
|                              | 17 years                | 6.4             | 7.4                            |                 |
|                              | 18 years                | 0.7             | 0.2                            |                 |
| Gender                       | Female                  | 54.4            | 51.9                           | 0.113           |
|                              | Male                    | 45.6            | 48.1                           |                 |
| Ethnicity                    | White                   | 68.2            | 70.8                           | <0.001          |
|                              | Black                   | 3.5             | 1.6                            |                 |
|                              | Asian                   | 6.1             | 4.2                            |                 |
|                              | Off-Reserve Aboriginal  | 0.8             | 2.3                            |                 |
|                              | Latin American/Hispanic | 1.3             | 2.5                            |                 |
|                              | Other/ Missing          | 20.2            | 18.6                           |                 |
| Number of friends that smoke | None                    | 79.3            | 74.5                           | 0.003           |
|                              | 1 friend                | 11.1            | 14.1                           |                 |
|                              | 2 friends               | 5.6             | 6.3                            |                 |
|                              | 3 friends               | 2.0             | 2.2                            |                 |
|                              | 4 friends               | 0.4             | 0.9                            |                 |
|                              | 5 friends or more       | 1.5             | 2.0                            |                 |

**Table S2.** Baseline school-level characteristics of control and intervention schools, 2012–13 COMPASS study, Ontario, ON, Canada.

| Characteristic at Baseline              |                               | Control Schools | Intervention Schools (Overall) |
|-----------------------------------------|-------------------------------|-----------------|--------------------------------|
| School-level prevalence                 | Non-susceptible never smokers | 59.7            | 55.1                           |
|                                         | Susceptible never smokers     | 22.1            | 21.9                           |
|                                         | Current smokers               | 2.4             | 3.4                            |
| School-level socioeconomic status (SES) | \$25,000–50,000               | 15.4            | 16.7                           |
|                                         | \$50,001–75,000               | 57.7            | 66.7                           |
|                                         | \$75,001–100,000              | 19.2            | 16.7                           |
|                                         | >\$100,000                    | 7.7             | 0.0                            |
| School location                         | Large urban area              | 53.8            | 50.0                           |
|                                         | Medium urban area             | 11.5            | 0.0                            |
|                                         | Small urban area/ rural area  | 34.6            | 50.0                           |
